# Supplementary material for: Porphyromonas gingivalis triggers the shedding of inflammatory endothelial microvesicles that act as autocrine effectors of endothelial dysfunction
Source: PubMed Central journal article supplement (PMC7000667; doi:10.1038/s41598-020-58374-z), 2020-02-04
Supplement: 41598_2020_58374_MOESM1_ESM.pdf [file 41598_2020_58374_MOESM1_ESM.pdf]

***Porphyromonas gingivalis* triggers the shedding of inflammatory endothelial microvesicles that act as autocrine effectors of endothelial dysfunction**

Isaac Maximiliano Bugueno, Fatiha Zobairi El-Ghazouani, Fareeha Batool, Hanine El Itawi, Eduardo Anglès-Cano, Nadia Benkirane-Jessel, Florence Toti and Olivier Huck

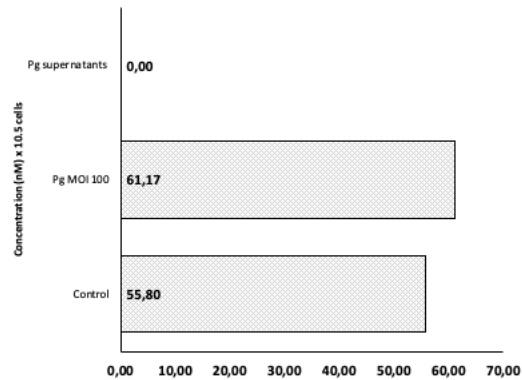

**Supplemental Figure 1. EMV dosage.** The generation of EMV from naïve EC (control), after 24h and of EC infected with *P.gingivalis* (*Pg*) (MOI=100) or *Pg* culture were measured in the supernatant by prothrombinase assay.

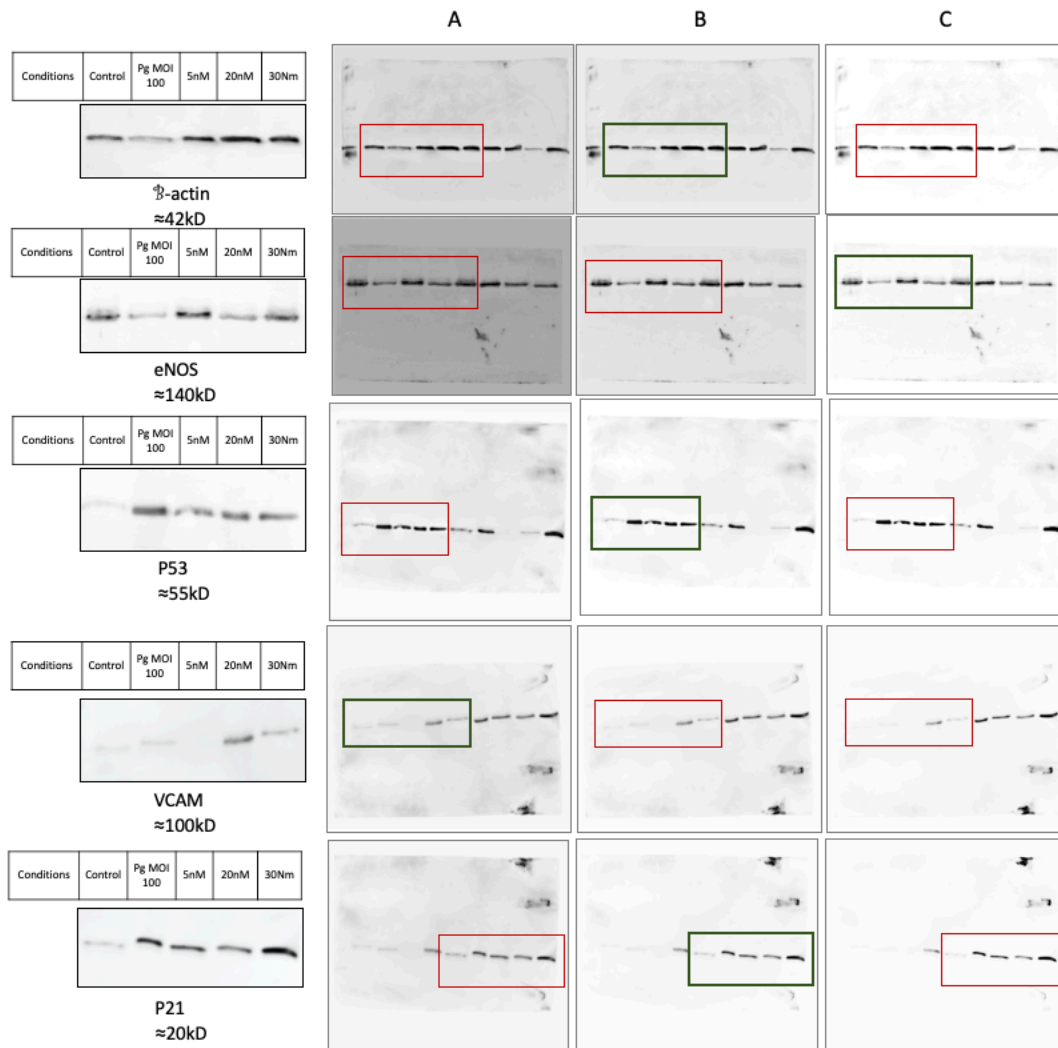

**Supplemental Figure 2. Western Blots.** The figure shows the original blots for  $\beta$ -actin, eNOS, P53, VCAM and P21, that were cut to indicate only the conditions that were chosen (Control, *Pg*, EMV<sub>*Pg*</sub> 5nM, 20nM and 30 nM). Brightness and contrast modifications were performed as shown in panels A, B and C. The green boxes show the area that was presented in the left panel of the figure, the red boxes indicate the same area but with a different time exposure.

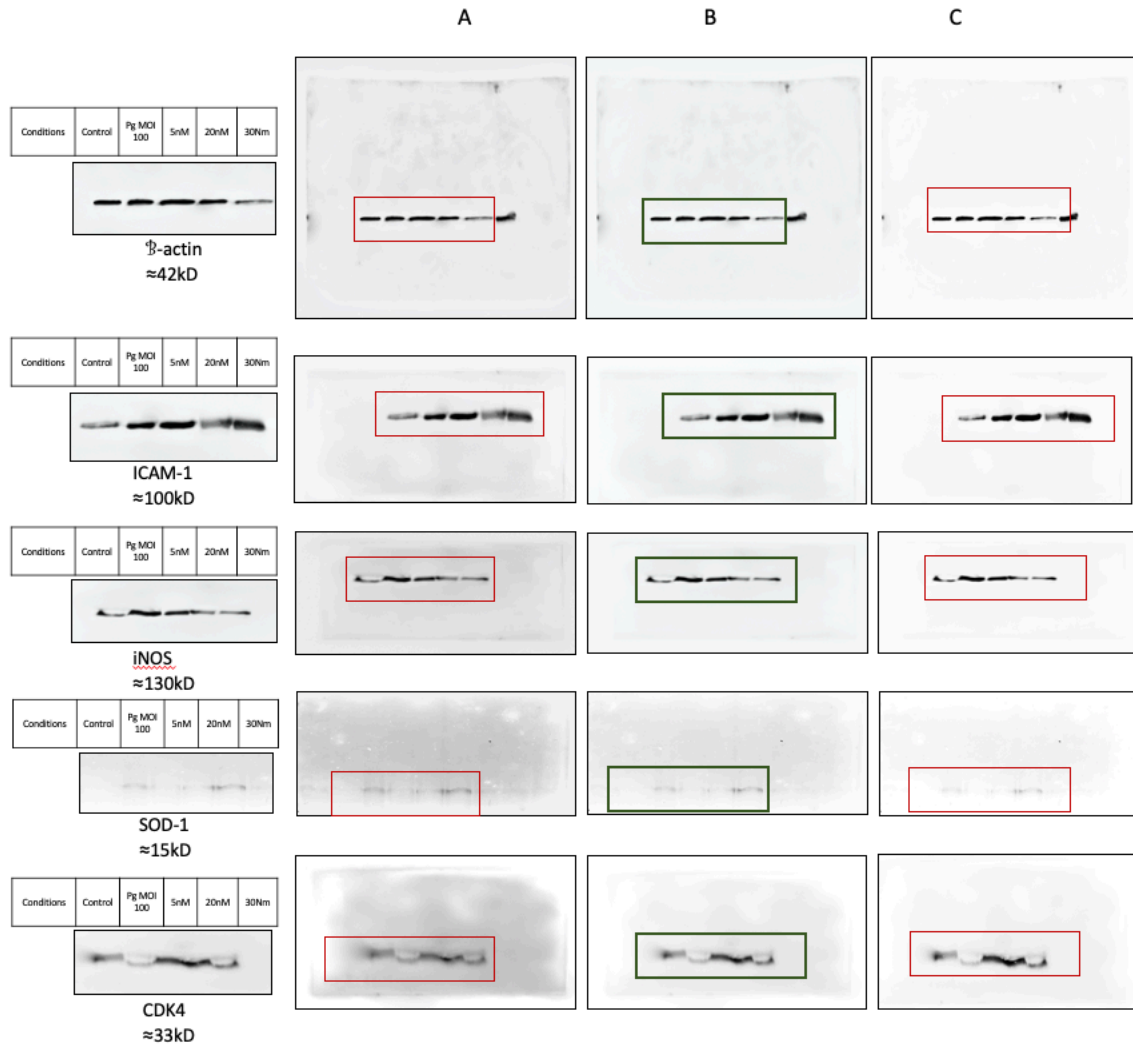

**Supplemental Figure 3. Western blots.** The figure shows the original blots for  $\beta$ -actin, ICAM-1, iNOS, SOD-1 and CDK-4, that were cut to indicate only the conditions that were chosen (Control, Pg, EMV<sub>Pg</sub> 5nM, 20nM and 30 nM). Brightness and contrast modifications were performed as shown in panels A, B and C. The green boxes show the area that was presented in the left panel of the figure, the red boxes indicate the same area but with a different time exposure.

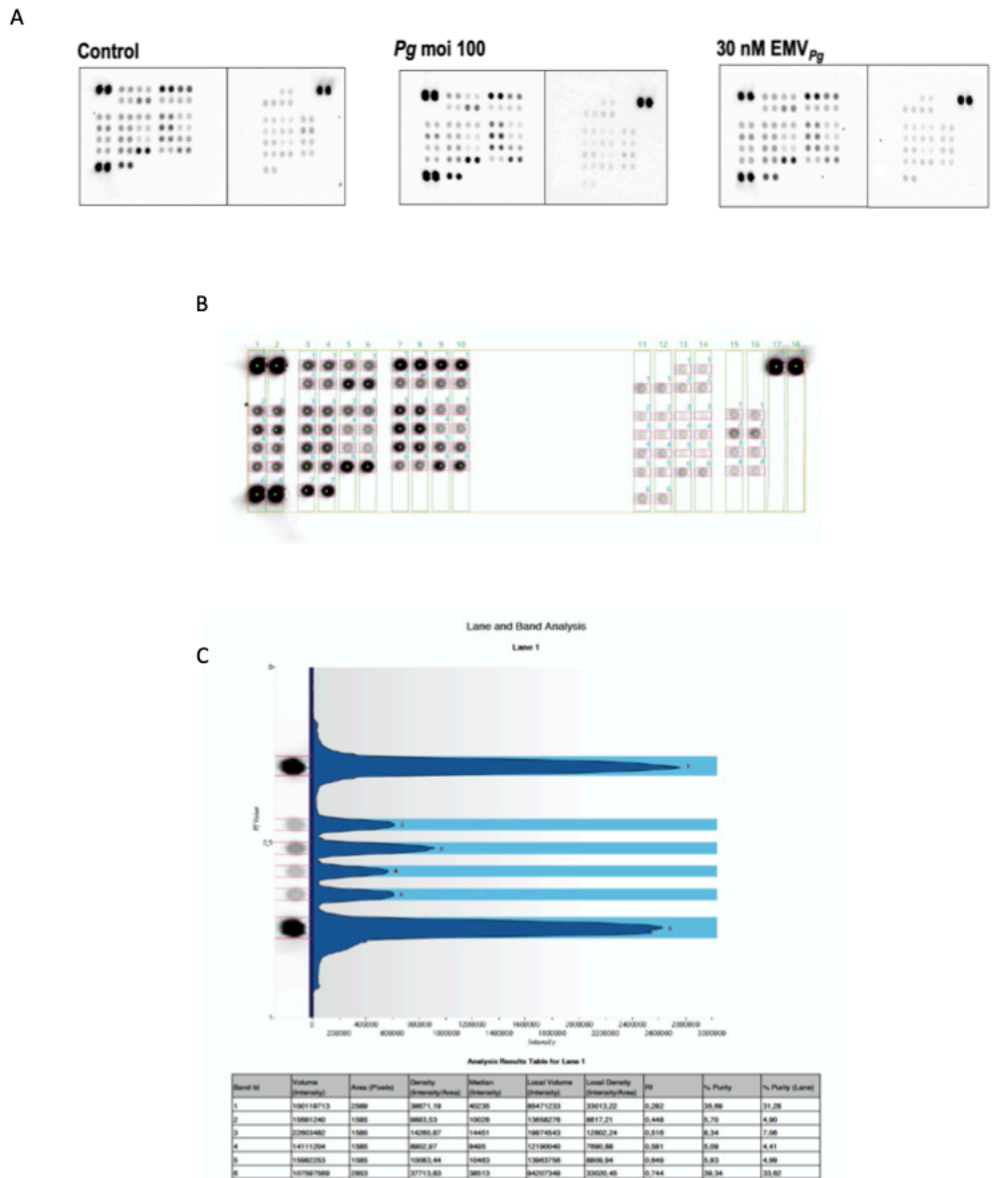

**Supplemental Figure 4. Analysis of kinases activation induced by *P.gingivalis* infection (*Pg*) (MOI:100) and *EMV<sub>Pg</sub>* (30 nM) for 24 h evaluated by phospho-kinase array.** (A) The density of spots was measured by MyImage™ Analysis Software 2.0 (Thermofisher) for each molecule and each condition. (B-C) The figure shows how the analysis has been performed for each of the blots of the “Proteome Profiler Human Phospho-Kinase Array Assay” (R&D Systems, Lille, France). Each spot per column and per line was analyzed according to its intensity. This density of spots, corresponding to protein activation, was measured by MyImage™ Analysis Software 2.0 (Thermofisher) for each molecule and each condition.
